# Supplementary material for: On optimal two-impulse Earth–Moon transfers in a four-body model
Source: Springer Nature journal article supplement (doi:10.1007/s10569-013-9513-8), 2013-08-29
Supplement: 10569_2013_9513_MOESM1_ESM.pdf [file 10569_2013_9513_MOESM1_ESM.pdf]

Celestial Mechanics and Dynamical Astronomy

Electronic Supplementary Material to

“On Optimal Two-Impulse Earth–Moon Transfers in a Four-Body Model”

by F. Topputo<sup>1</sup>

The initial conditions of the points highlighted in Figure 7 are reported in Table A. These numerical values are given with high accuracy (15 decimals) to allow an independent reproduction of the results. The Pareto-efficient solutions can be reconstructed by simply integrating the initial conditions under the PBRFBP dynamics; i.e. the  $i$ -th transfer or bit is  $\gamma^{(i)} = \{\varphi(\mathbf{x}_i, t_i; t), t \leq t_f\}$  where  $\varphi$  is the flow of (5).

Table A: Initial condition  $\mathbf{x}_i = (x_i, y_i, \dot{x}_i, \dot{y}_i)$  and initial, final time,  $t_i, t_f$  of solutions (i)–(x) in Figure 7, 8 and Table 4.

|             | (i)                | (ii)               | (iii)              | (iv)               | (v)                |
|-------------|--------------------|--------------------|--------------------|--------------------|--------------------|
| $x_i$       | -0.019710793706630 | 0.004430665316507  | -0.022223338375692 | -0.022469248813271 | -0.020509279478864 |
| $y_i$       | -0.015255813698632 | 0.003867133727872  | -0.013727223510871 | -0.013543346852322 | -0.014833373417121 |
| $\dot{x}_i$ | 9.554404402969761  | -2.421772563013686 | 8.593048071999794  | 8.477163558651014  | 9.289091958818513  |
| $\dot{y}_i$ | -4.734752068884238 | 10.383974704885071 | -6.305349228506921 | -6.458691168284453 | -5.234406611705439 |
| $t_i$       | -1.803851247295145 | -4.242568609277442 | 28.854324263774792 | 5.183780363655846  | -2.783372600934104 |
| $t_f$       | -0.745915731505332 | -0.928062659449309 | 35.904880040219062 | 12.518449758919608 | 7.256777745724602  |
|             | (vi)               | (vii)              | (viii)             | (ix)               | (x)                |
| $x_i$       | -0.020796119659883 | -0.021300676720177 | -0.019048265996746 | -0.019022730972677 | -0.020288471040515 |
| $y_i$       | -0.014668044128481 | -0.014358714903565 | -0.015566582598150 | -0.015577872203673 | -0.014955651584857 |
| $\dot{x}_i$ | 9.185639864842763  | 8.996820692867965  | 9.751858086858906  | 9.759101553325923  | 9.365880586172640  |
| $\dot{y}_i$ | -5.414082611512081 | -5.733172198727265 | -4.321076476149917 | -4.305155198773667 | -5.096246610790654 |
| $t_i$       | -2.825197110547974 | 3.020458855979923  | 2.932062269968396  | 6.480457482011631  | 0.068219944002269  |
| $t_f$       | 8.989837035669957  | 17.277056927521521 | 17.819572739337175 | 21.838729667546875 | 19.078513034970545 |

Table B: Data of transfer samples belonging to family  $a$  ( $\Delta v$  are in m/s).

| Sol     | $\alpha$       | $\beta$        | $\theta_i$     | $\delta$        | $h_{2,f}$ | $H_{2,f}$ | $J_f$  | $\Delta v_f$ | $\Delta v$ |
|---------|----------------|----------------|----------------|-----------------|-----------|-----------|--------|--------------|------------|
| $a_1^+$ | 4.252290888376 | 1.402157100606 | 1.667383569559 | 1.057924428519  | 0.0114    | 0.3056    | 2.3752 | 810.4        | 3944.8     |
| $a_2^+$ | 5.633879787539 | 1.404945878425 | 6.144515170400 | 2.615962829677  | 0.0118    | 0.5158    | 1.9557 | 898.9        | 4055.0     |
| $a_3^+$ | 0.842979367789 | 1.406764463306 | 1.356688768053 | 4.218742460358  | 0.0120    | 0.6268    | 1.7340 | 944.4        | 4114.7     |
| $a_4^+$ | 3.348939227571 | 1.408514488040 | 3.842249354110 | 6.903698075803  | 0.0121    | 0.6608    | 1.6662 | 958.2        | 4142.2     |
| $a_5^+$ | 4.208338472731 | 1.402044205156 | 2.577489648304 | 10.000795545595 | 0.0110    | 0.0928    | 2.8000 | 717.3        | 3850.9     |
| $a_1^-$ | 4.065178639568 | 1.403442468457 | 1.353198236767 | 0.805366820770  | -0.0116   | 0.3894    | 2.1616 | 846.0        | 3990.5     |
| $a_2^-$ | 5.361124260595 | 1.404539474349 | 2.709286366639 | 2.325548051238  | -0.0117   | 0.4637    | 2.0126 | 877.3        | 4030.2     |
| $a_3^-$ | 1.192584194881 | 1.407111594526 | 4.839299650398 | 4.600129475444  | -0.0120   | 0.6182    | 1.7030 | 940.9        | 4114.0     |
| $a_4^-$ | 3.648464977227 | 1.408184543861 | 4.184825367605 | 7.361643034256  | -0.0120   | 0.5875    | 1.7645 | 928.4        | 4109.8     |
| $a_5^-$ | 4.204117236811 | 1.402044483564 | 2.577354362392 | 10.046535968859 | -0.0109   | 0.0682    | 2.8053 | 706.4        | 3839.9     |

<sup>1</sup>Francesco Topputo, Department of Aerospace Science and Technology, Politecnico di Milano, francesco.topputo@polimi.it

Table C: Data of transfer samples belonging to family  $b$  ( $\Delta v$  are in m/s).

| Sol     | $\alpha$       | $\beta$        | $\theta_i$     | $\delta$       | $h_{2,f}$ | $H_{2,f}$ | $J_f$  | $\Delta v_f$ | $\Delta v$ |
|---------|----------------|----------------|----------------|----------------|-----------|-----------|--------|--------------|------------|
| $b_1^+$ | 0.215107085265 | 1.402558265613 | 3.849790162865 | 3.259791073632 | 0.0115    | 0.3273    | 2.3318 | 819.7        | 3957.2     |
| $b_2^+$ | 3.274914018198 | 1.405452575015 | 3.756543962351 | 6.607868389938 | 0.0118    | 0.5180    | 1.9512 | 899.8        | 4059.9     |
| $b_3^+$ | 4.165806662212 | 1.401846765827 | 1.886983805417 | 8.274468720509 | 0.0112    | 0.2230    | 2.5400 | 774.7        | 3906.7     |
| $b_4^+$ | 3.259404571570 | 1.407406549835 | 3.750174623792 | 6.136442170987 | 0.0121    | 0.6506    | 1.6865 | 954.1        | 4129.4     |
| $b_5^+$ | 4.157563742559 | 1.401965337718 | 5.358624840898 | 7.156365100673 | 0.0113    | 0.2271    | 2.5319 | 776.5        | 3909.4     |
| $b_1^-$ | 0.369715173230 | 1.402447258122 | 4.111746882921 | 3.447508808550 | -0.0114   | 0.2929    | 2.3551 | 804.9        | 3941.6     |
| $b_2^-$ | 2.448166521256 | 1.404884548712 | 2.928808142085 | 5.709718695759 | -0.0117   | 0.4635    | 2.0130 | 877.2        | 4032.8     |
| $b_3^-$ | 4.174580210102 | 1.401849858010 | 5.034553918006 | 8.296390114353 | -0.0112   | 0.2009    | 2.5393 | 765.1        | 3897.1     |
| $b_4^-$ | 3.046686676441 | 1.407291052413 | 0.394041543680 | 5.917404290307 | -0.0120   | 0.6239    | 1.6918 | 943.2        | 4117.6     |
| $b_5^-$ | 4.009503069577 | 1.402538262443 | 5.335357166595 | 6.939241208037 | -0.0113   | 0.2510    | 2.4390 | 786.8        | 3924.2     |

Table D: Data of transfer samples belonging to families  $c$ ,  $d$  ( $\Delta v$  are in m/s).

| Sol     | $\alpha$       | $\beta$        | $\theta_i$     | $\delta$       | $h_{2,f}$ | $H_{2,f}$ | $J_f$  | $\Delta v_f$ | $\Delta v$ |
|---------|----------------|----------------|----------------|----------------|-----------|-----------|--------|--------------|------------|
| $c_1^+$ | 4.063783494297 | 1.401522012103 | 4.729454191036 | 7.033898841089 | 0.0112    | 0.2210    | 2.5441 | 773.8        | 3903.3     |
| $c_2^+$ | 3.427285099082 | 1.403560818424 | 3.960945550035 | 6.432889714852 | 0.0116    | 0.3848    | 2.2171 | 844.1        | 3989.4     |
| $c_3^+$ | 2.480707696443 | 1.402212056844 | 3.058819808299 | 5.568006948406 | 0.0114    | 0.2872    | 2.4118 | 802.5        | 3937.3     |
| $c_4^+$ | 3.611131345279 | 1.402530026335 | 0.973402713645 | 6.835050408181 | 0.0114    | 0.3034    | 2.3797 | 809.4        | 3946.7     |
| $c_5^+$ | 4.058039114112 | 1.401354929668 | 4.627277971792 | 7.351584618527 | 0.0112    | 0.2084    | 2.5693 | 768.3        | 3896.5     |
| $c_1^-$ | 2.754201657972 | 1.402549179605 | 0.140469901096 | 5.845327519691 | -0.0114   | 0.2892    | 2.3623 | 803.3        | 3940.8     |
| $c_2^-$ | 3.345726014275 | 1.402767798775 | 3.858325285979 | 6.517058277713 | -0.0114   | 0.3017    | 2.3374 | 808.7        | 3947.8     |
| $c_3^-$ | 3.644279711940 | 1.402538537507 | 4.214717313285 | 6.864330024760 | -0.0114   | 0.2805    | 2.3799 | 799.6        | 3936.9     |
| $c_4^-$ | 4.059331479473 | 1.401372370370 | 1.489986039842 | 7.332369547055 | -0.0112   | 0.1872    | 2.5668 | 759.0        | 3887.3     |
| $c_5^-$ | 4.317064117351 | 1.401795637660 | 1.626612380287 | 7.603967576489 | -0.0112   | 0.2195    | 2.5021 | 773.1        | 3904.7     |
| $d_1^-$ | 3.636565150564 | 1.403294333379 | 4.238298754471 | 6.627383705975 | -0.0115   | 0.3384    | 2.2639 | 824.4        | 3967.7     |
| $d_2^-$ | 3.830120656954 | 1.402475710481 | 4.599398609960 | 6.806771866283 | -0.0113   | 0.2740    | 2.3928 | 796.8        | 3933.7     |
| $d_3^-$ | 3.912445608858 | 1.401972200392 | 4.719249053231 | 6.882666857182 | -0.0113   | 0.2352    | 2.4706 | 780.0        | 3913.0     |
| $d_4^-$ | 4.081266358623 | 1.401499904826 | 4.715879986486 | 7.052855624653 | -0.0112   | 0.1971    | 2.5470 | 763.4        | 3892.7     |
| $d_5^-$ | 4.319515000948 | 1.401856714554 | 4.814428742190 | 7.308138775860 | -0.0112   | 0.2246    | 2.4918 | 775.4        | 3907.5     |

Table E: Data of transfer samples belonging to families  $e$ ,  $f$  ( $\Delta v$  are in m/s).

| Sol     | $\alpha$       | $\beta$        | $\theta_i$     | $\delta$        | $h_{2,f}$ | $H_{2,f}$ | $J_f$  | $\Delta v_f$ | $\Delta v$ |
|---------|----------------|----------------|----------------|-----------------|-----------|-----------|--------|--------------|------------|
| $e_1^+$ | 4.147723781636 | 1.402092137706 | 2.605803338547 | 11.927916322073 | 0.0109    | 0.0654    | 2.8546 | 705.1        | 3839.0     |
| $e_2^+$ | 4.195381970611 | 1.402051060212 | 2.610120027190 | 11.993419445390 | 0.0109    | 0.0622    | 2.8609 | 703.7        | 3837.3     |
| $e_3^+$ | 4.260192508069 | 1.402077533643 | 2.583250061439 | 12.189159262373 | 0.0109    | 0.0665    | 2.8524 | 705.6        | 3839.4     |
| $e_1^-$ | 4.157159925241 | 1.402078177710 | 2.606801550042 | 11.792074367447 | -0.0109   | 0.0444    | 2.8531 | 695.6        | 3829.4     |
| $e_2^-$ | 4.198832470368 | 1.402050110977 | 2.615526630965 | 11.845042863911 | -0.0109   | 0.0422    | 2.8575 | 694.7        | 3828.2     |
| $e_3^-$ | 4.253525586153 | 1.402071132405 | 2.580695323732 | 12.028283844219 | -0.0109   | 0.0457    | 2.8505 | 696.2        | 3830.0     |
| $f_1^+$ | 4.151891843626 | 1.402086002986 | 5.754845919871 | 11.947569714772 | 0.0109    | 0.0665    | 2.8525 | 705.6        | 3839.4     |
| $f_2^+$ | 4.198799517273 | 1.402050417800 | 5.749491822325 | 12.022361413507 | 0.0109    | 0.0637    | 2.8580 | 704.3        | 3837.9     |
| $f_3^+$ | 4.261357040927 | 1.402078716812 | 5.725135179832 | 12.214621956991 | 0.0109    | 0.0683    | 2.8488 | 706.4        | 3840.2     |
| $f_1^-$ | 4.167548260354 | 1.402066910825 | 5.760425792268 | 11.819314675018 | -0.0109   | 0.0451    | 2.8517 | 696.0        | 3829.7     |
| $f_2^-$ | 4.204197741898 | 1.402049631276 | 5.753494375038 | 11.881742813297 | -0.0109   | 0.0436    | 2.8547 | 695.3        | 3828.9     |
| $f_3^-$ | 4.253697429252 | 1.402071225331 | 5.715732940351 | 12.066575362480 | -0.0109   | 0.0478    | 2.8462 | 697.2        | 3830.9     |

Table F: Data of transfer samples belonging to families  $g, h, i$  ( $\Delta v$  are in m/s).

| Sol     | $\alpha$       | $\beta$        | $\theta_i$     | $\delta$        | $h_{2,f}$ | $H_{2,f}$ | $J_f$  | $\Delta v_f$ | $\Delta v$ |
|---------|----------------|----------------|----------------|-----------------|-----------|-----------|--------|--------------|------------|
| $g_1^-$ | 4.182373037335 | 1.402684711341 | 0.363550323766 | 14.269053511658 | -0.0108   | 0.0282    | 2.8854 | 688.4        | 3826.9     |
| $g_2^-$ | 4.193694329121 | 1.402659006474 | 0.348200642583 | 14.480639546892 | -0.0108   | 0.0029    | 2.9362 | 676.9        | 3815.2     |
| $g_3^-$ | 4.210707138843 | 1.402626439171 | 0.341622063212 | 14.775020117653 | -0.0107   | -0.0156   | 2.9733 | 668.5        | 3806.6     |
| $h_1^-$ | 4.146820623243 | 1.402811711822 | 3.484711717309 | 14.293395642887 | -0.0108   | 0.0237    | 2.8945 | 686.3        | 3825.9     |
| $h_2^-$ | 4.158855464025 | 1.402766619679 | 3.461436386250 | 14.550978642303 | -0.0108   | -0.0044   | 2.9508 | 673.6        | 3812.8     |
| $h_3^-$ | 4.156352594944 | 1.402778112755 | 3.446111907596 | 14.799362248882 | -0.0107   | -0.0160   | 2.9741 | 668.3        | 3807.6     |
| $i_1^-$ | 4.142242238369 | 1.402864925471 | 0.147362458330 | 14.999495864920 | -0.0107   | -0.0139   | 2.9699 | 669.3        | 3809.2     |
| $i_2^-$ | 4.276480721750 | 1.402588579355 | 0.264434008643 | 15.321474614190 | -0.0107   | -0.0262   | 2.9946 | 663.7        | 3801.4     |
| $i_3^-$ | 4.515321794137 | 1.402847722785 | 0.586057434959 | 15.735447291823 | -0.0107   | -0.0231   | 2.9884 | 665.1        | 3804.9     |

Table G: Data of transfer samples belonging to families  $j, k$  ( $\Delta v$  are in m/s).

| Sol     | $\alpha$       | $\beta$        | $\theta_i$     | $\delta$        | $h_{2,f}$ | $H_{2,f}$ | $J_f$  | $\Delta v_f$ | $\Delta v$ |
|---------|----------------|----------------|----------------|-----------------|-----------|-----------|--------|--------------|------------|
| $j_1^+$ | 3.964544365380 | 1.403677338743 | 2.566384589700 | 16.726246530120 | 0.0108    | -0.0123   | 3.0096 | 670.0        | 3816.3     |
| $j_2^+$ | 4.224630330202 | 1.402077884057 | 3.124301761209 | 17.343745112358 | 0.0107    | -0.0155   | 3.0161 | 668.5        | 3802.3     |
| $j_3^+$ | 4.379504445319 | 1.402261932010 | 3.265483278329 | 17.776482729342 | 0.0108    | 0.0160    | 2.9531 | 682.9        | 3818.1     |
| $k_1^-$ | 3.998645459380 | 1.402942049099 | 5.082145382774 | 17.750632495335 | -0.0107   | -0.0233   | 2.9886 | 665.0        | 3805.5     |
| $k_2^-$ | 4.185108110638 | 1.402063044418 | 5.424761343788 | 18.340788665943 | -0.0107   | -0.0248   | 2.9916 | 664.3        | 3798.0     |
| $k_3^-$ | 4.415821829794 | 1.402347743273 | 5.601695298837 | 18.691070596272 | -0.0107   | -0.0153   | 2.9726 | 668.6        | 3804.5     |

Table H: Data of transfer samples belonging to families  $l, m, n$  ( $\Delta v$  are in m/s).

| Sol     | $\alpha$       | $\beta$        | $\theta_i$     | $\delta$        | $h_{2,f}$ | $H_{2,f}$ | $J_f$  | $\Delta v_f$ | $\Delta v$ |
|---------|----------------|----------------|----------------|-----------------|-----------|-----------|--------|--------------|------------|
| $l_1^+$ | 3.930005399924 | 1.404474334702 | 2.325367081777 | 18.019421332231 | 0.0106    | -0.0811   | 3.1470 | 638.5        | 3791.0     |
| $l_2^+$ | 4.220630050535 | 1.402077201559 | 3.079433652998 | 18.995187228240 | 0.0106    | -0.0875   | 3.1597 | 635.5        | 3769.3     |
| $l_3^+$ | 4.356872352938 | 1.402222234881 | 3.194009044816 | 19.608480083992 | 0.0106    | -0.0830   | 3.1508 | 637.6        | 3772.5     |
| $m_1^+$ | 4.104575443108 | 1.402214480627 | 2.326603682628 | 19.307322661917 | 0.0106    | -0.0731   | 3.1309 | 642.2        | 3777.0     |
| $m_2^+$ | 4.223508200180 | 1.402068654459 | 2.488499275868 | 19.986664215269 | 0.0106    | -0.0799   | 3.1445 | 639.1        | 3798.0     |
| $m_3^+$ | 4.257932789284 | 1.402089731019 | 2.519022246012 | 20.501608427470 | 0.0106    | -0.0786   | 3.1420 | 639.6        | 3773.5     |
| $n_1^+$ | 4.179792908771 | 1.402073278208 | 2.415786468262 | 19.273871487267 | 0.0106    | -0.0676   | 3.1200 | 644.7        | 3778.5     |
| $n_2^+$ | 4.228410728757 | 1.402069510648 | 2.468556607257 | 19.540862454225 | 0.0106    | -0.0685   | 3.1219 | 644.3        | 3778.0     |
| $n_3^+$ | 4.290172468528 | 1.402124322768 | 2.516364378097 | 19.811434667184 | 0.0106    | -0.0648   | 3.1146 | 646.0        | 3780.1     |

Table I: Data of transfer samples belonging to families  $o, p$  ( $\Delta v$  are in m/s).

| Sol     | $\alpha$       | $\beta$        | $\theta_i$     | $\delta$        | $h_{2,f}$ | $H_{2,f}$ | $J_f$  | $\Delta v_f$ | $\Delta v$ |
|---------|----------------|----------------|----------------|-----------------|-----------|-----------|--------|--------------|------------|
| $o_1^-$ | 4.879245051664 | 1.410883844595 | 2.161746749933 | 16.363634525136 | -0.0109   | 0.0445    | 2.8529 | 695.7        | 3898.1     |
| $o_2^-$ | 5.184028756452 | 1.410782605499 | 2.452415468264 | 17.073559777403 | -0.0108   | -0.0019   | 2.9459 | 674.7        | 3876.3     |
| $o_3^-$ | 6.010810818630 | 1.410297239534 | 3.098975200907 | 18.136052888078 | -0.0108   | -0.0111   | 2.9643 | 670.5        | 3868.4     |
| $o_4^-$ | 0.930095035965 | 1.409995191083 | 4.164633566715 | 19.501102334758 | -0.0107   | -0.0142   | 2.9705 | 669.1        | 3864.6     |
| $o_5^-$ | 2.639014031620 | 1.410096258819 | 5.704212537244 | 21.246362344147 | -0.0107   | -0.0149   | 2.9719 | 668.8        | 3865.1     |
| $o_1^+$ | 5.155853349247 | 1.410841292153 | 2.457175409153 | 16.737697460259 | 0.0109    | 0.0337    | 2.9179 | 690.8        | 3892.9     |
| $o_2^+$ | 5.582512158897 | 1.410784101535 | 2.907677514655 | 17.641774656389 | 0.0107    | -0.0269   | 3.0389 | 663.3        | 3865.0     |
| $o_3^+$ | 0.200953325157 | 1.410243144276 | 3.610927074222 | 18.944143114293 | 0.0107    | -0.0430   | 3.0710 | 656.0        | 3853.4     |
| $o_4^+$ | 1.583248031688 | 1.410049492793 | 4.843168338916 | 20.564358230666 | 0.0107    | -0.0484   | 3.0818 | 653.5        | 3849.4     |
| $o_5^+$ | 2.992640834820 | 1.410138804114 | 6.124220359858 | 22.104190300919 | 0.0107    | -0.0502   | 3.0853 | 652.7        | 3849.3     |
| $p_1^-$ | 5.022229171492 | 1.410854603396 | 5.450049207204 | 16.557256512153 | -0.0109   | 0.0373    | 2.8672 | 692.5        | 3894.7     |
| $p_2^-$ | 5.497639357010 | 1.410589260809 | 5.837144088936 | 17.515628439560 | -0.0108   | -0.0068   | 2.9556 | 672.5        | 3872.6     |
| $p_3^-$ | 0.020486154561 | 1.410222523303 | 0.228748281106 | 18.435337099453 | -0.0108   | -0.0110   | 2.9640 | 670.6        | 3867.9     |
| $p_4^-$ | 1.519672362685 | 1.410008239478 | 1.562386938068 | 20.049687489479 | -0.0108   | -0.0134   | 2.9688 | 669.5        | 3865.1     |
| $p_5^-$ | 3.058423279463 | 1.410119885948 | 2.958114992217 | 21.634523489859 | -0.0107   | -0.0139   | 2.9699 | 669.3        | 3865.7     |
| $p_1^+$ | 5.291490796795 | 1.410828177263 | 5.744478012088 | 16.911536728630 | 0.0108    | 0.0280    | 2.9292 | 688.3        | 3890.3     |
| $p_2^+$ | 5.709785601599 | 1.410724644300 | 6.161021805049 | 17.859885956506 | 0.0107    | -0.0310   | 3.0469 | 661.5        | 3862.7     |
| $p_3^+$ | 0.445786440664 | 1.410197120338 | 0.694406155661 | 19.242562023524 | 0.0107    | -0.0427   | 3.0703 | 656.1        | 3853.2     |
| $p_4^+$ | 2.497306252429 | 1.410152727146 | 2.529928887739 | 21.526887933769 | 0.0107    | -0.0477   | 3.0802 | 653.9        | 3850.6     |
| $p_5^+$ | 3.342284641749 | 1.410052131810 | 3.321547105013 | 22.477024424883 | 0.0107    | -0.0491   | 3.0830 | 653.2        | 3849.2     |

Table J: Data of transfer samples belonging to families  $q, r, s, t$  ( $\Delta v$  are in m/s).

| Sol     | $\alpha$       | $\beta$        | $\theta_i$     | $\delta$        | $h_{2,f}$ | $H_{2,f}$ | $J_f$  | $\Delta v_f$ | $\Delta v$ |
|---------|----------------|----------------|----------------|-----------------|-----------|-----------|--------|--------------|------------|
| $q_1^+$ | 0.033811938038 | 1.410659119648 | 3.674130519906 | 19.741812297022 | 0.0106    | -0.0797   | 3.1442 | 639.1        | 3839.8     |
| $q_2^+$ | 0.108791841830 | 1.410562400439 | 3.710222767135 | 19.968241671325 | 0.0106    | -0.0842   | 3.1532 | 637.0        | 3837.0     |
| $q_3^+$ | 0.491223999802 | 1.410319147095 | 3.992195057834 | 20.656893741883 | 0.0106    | -0.0844   | 3.1535 | 637.0        | 3835.0     |
| $r_1^+$ | 0.134835807387 | 1.410654308228 | 0.638851039185 | 19.848727670143 | 0.0106    | -0.0799   | 3.1446 | 639.1        | 3839.7     |
| $r_2^+$ | 0.223467001790 | 1.410536615589 | 0.677798266138 | 20.061061770190 | 0.0106    | -0.0837   | 3.1522 | 637.3        | 3837.0     |
| $r_3^+$ | 0.436505534285 | 1.410398783888 | 0.833540037572 | 20.584679097046 | 0.0106    | -0.0849   | 3.1546 | 636.7        | 3835.4     |
| $s_1^-$ | 4.170159232525 | 1.402721869479 | 6.239280173013 | 20.127265918812 | -0.0109   | 0.0606    | 2.8205 | 703.0        | 3841.8     |
| $s_2^-$ | 4.194204735702 | 1.402656967129 | 6.244249804099 | 20.387915382506 | -0.0108   | 0.0258    | 2.8903 | 687.3        | 3825.6     |
| $s_3^-$ | 4.252748833570 | 1.402575402277 | 0.003397203349 | 20.541238596444 | -0.0108   | 0.0207    | 2.9006 | 685.0        | 3822.6     |
| $t_1^-$ | 4.393669118705 | 1.402638082275 | 3.341235442267 | 20.349343117732 | -0.0109   | 0.0671    | 2.8076 | 705.8        | 3844.0     |
| $t_2^-$ | 4.406123815897 | 1.402654623089 | 3.356592324586 | 20.540997135154 | -0.0109   | 0.0375    | 2.8668 | 692.6        | 3830.8     |
| $t_3^-$ | 4.419973474774 | 1.402674069227 | 3.374381594258 | 20.732651152577 | -0.0108   | 0.0223    | 2.8972 | 685.7        | 3824.2     |
